# Supplementary material
Source: PubMed Central journal article supplement (PMC8632891)

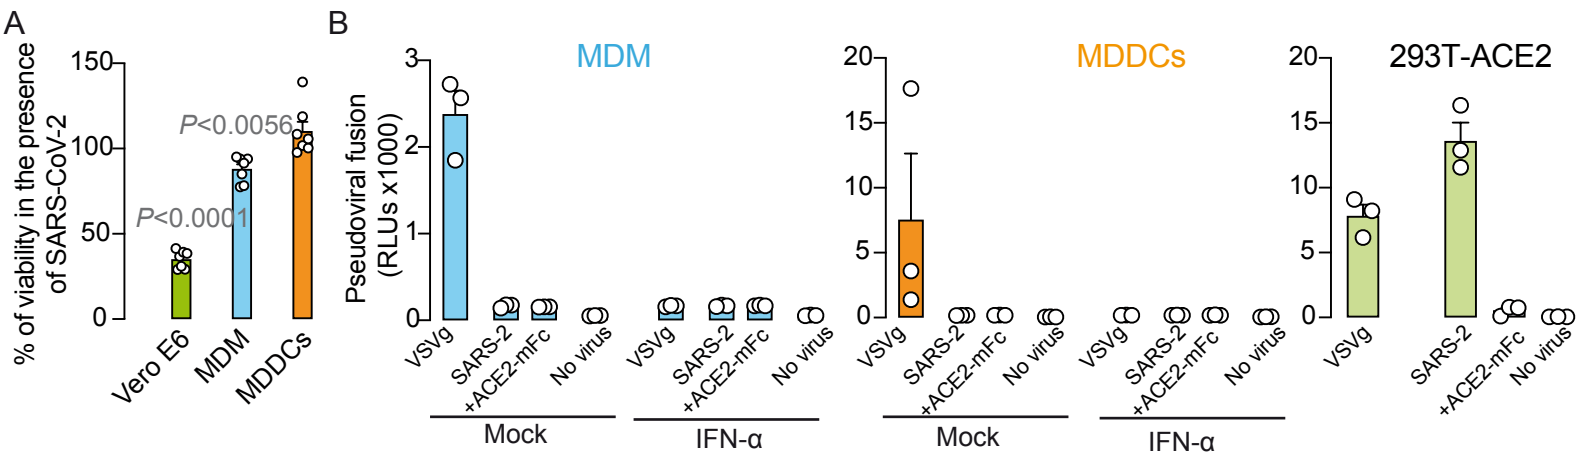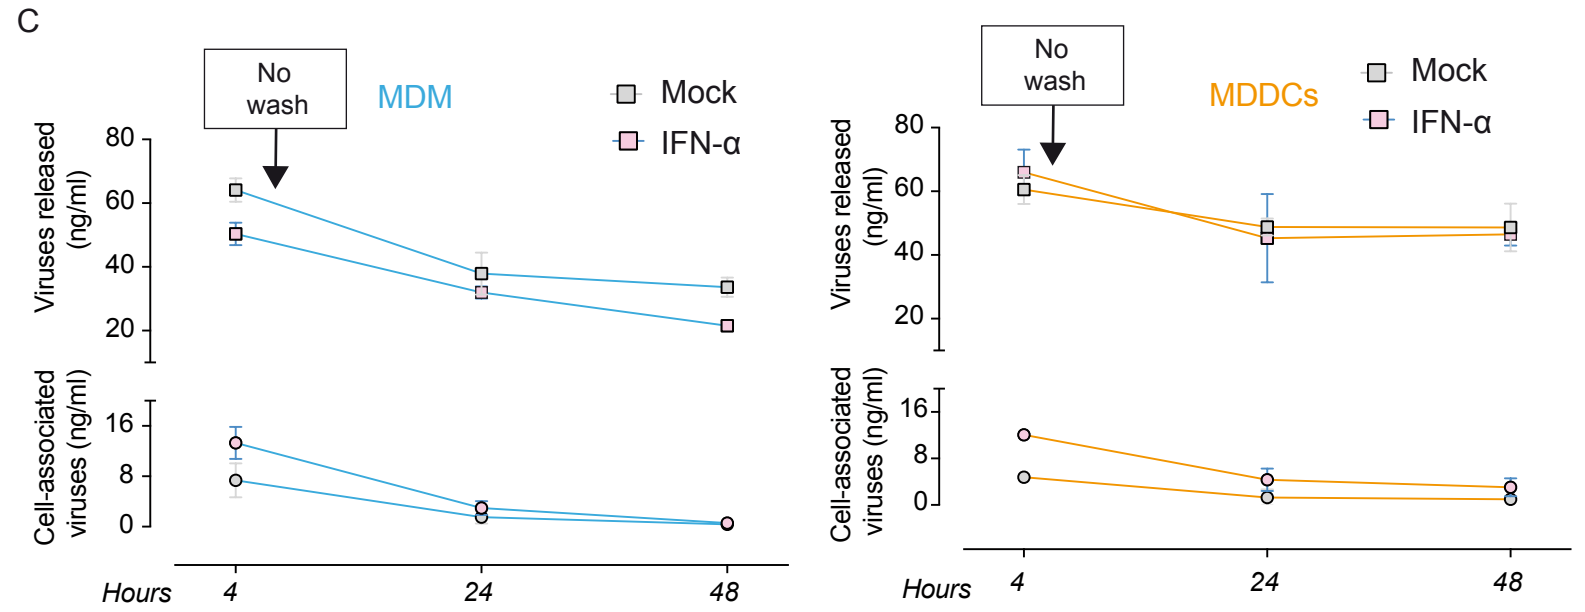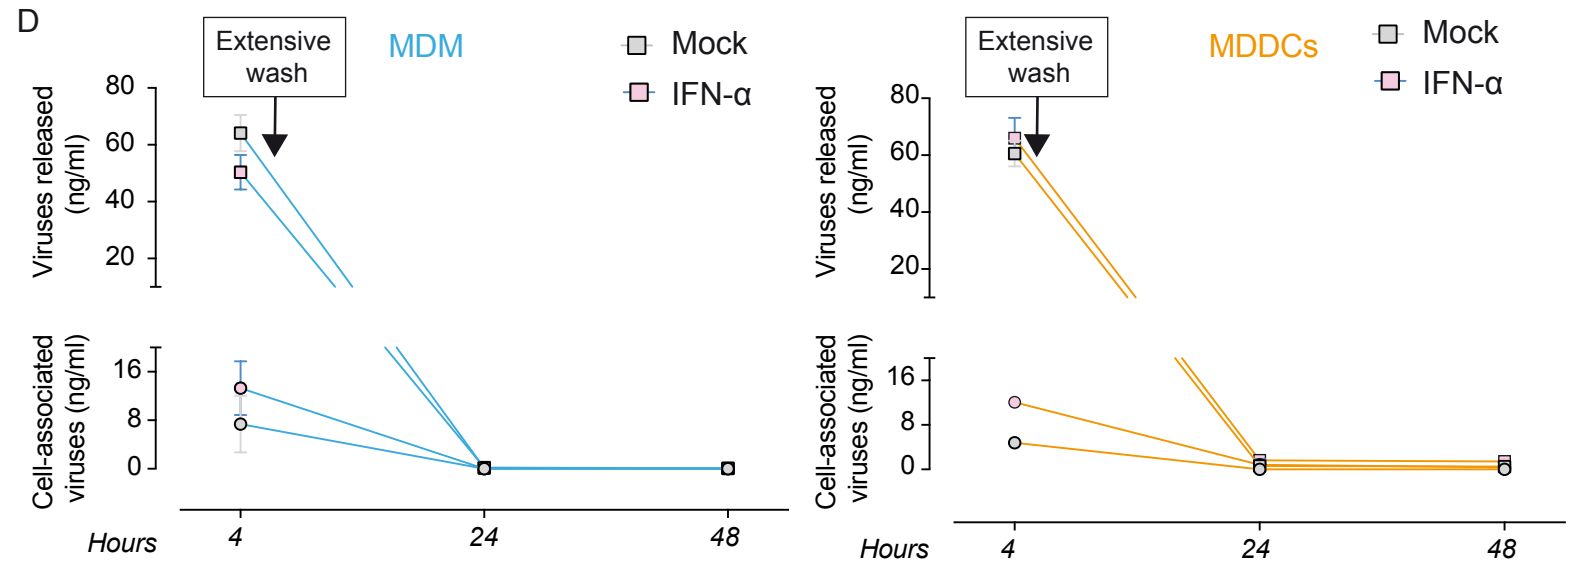

Supplementary Figure 1

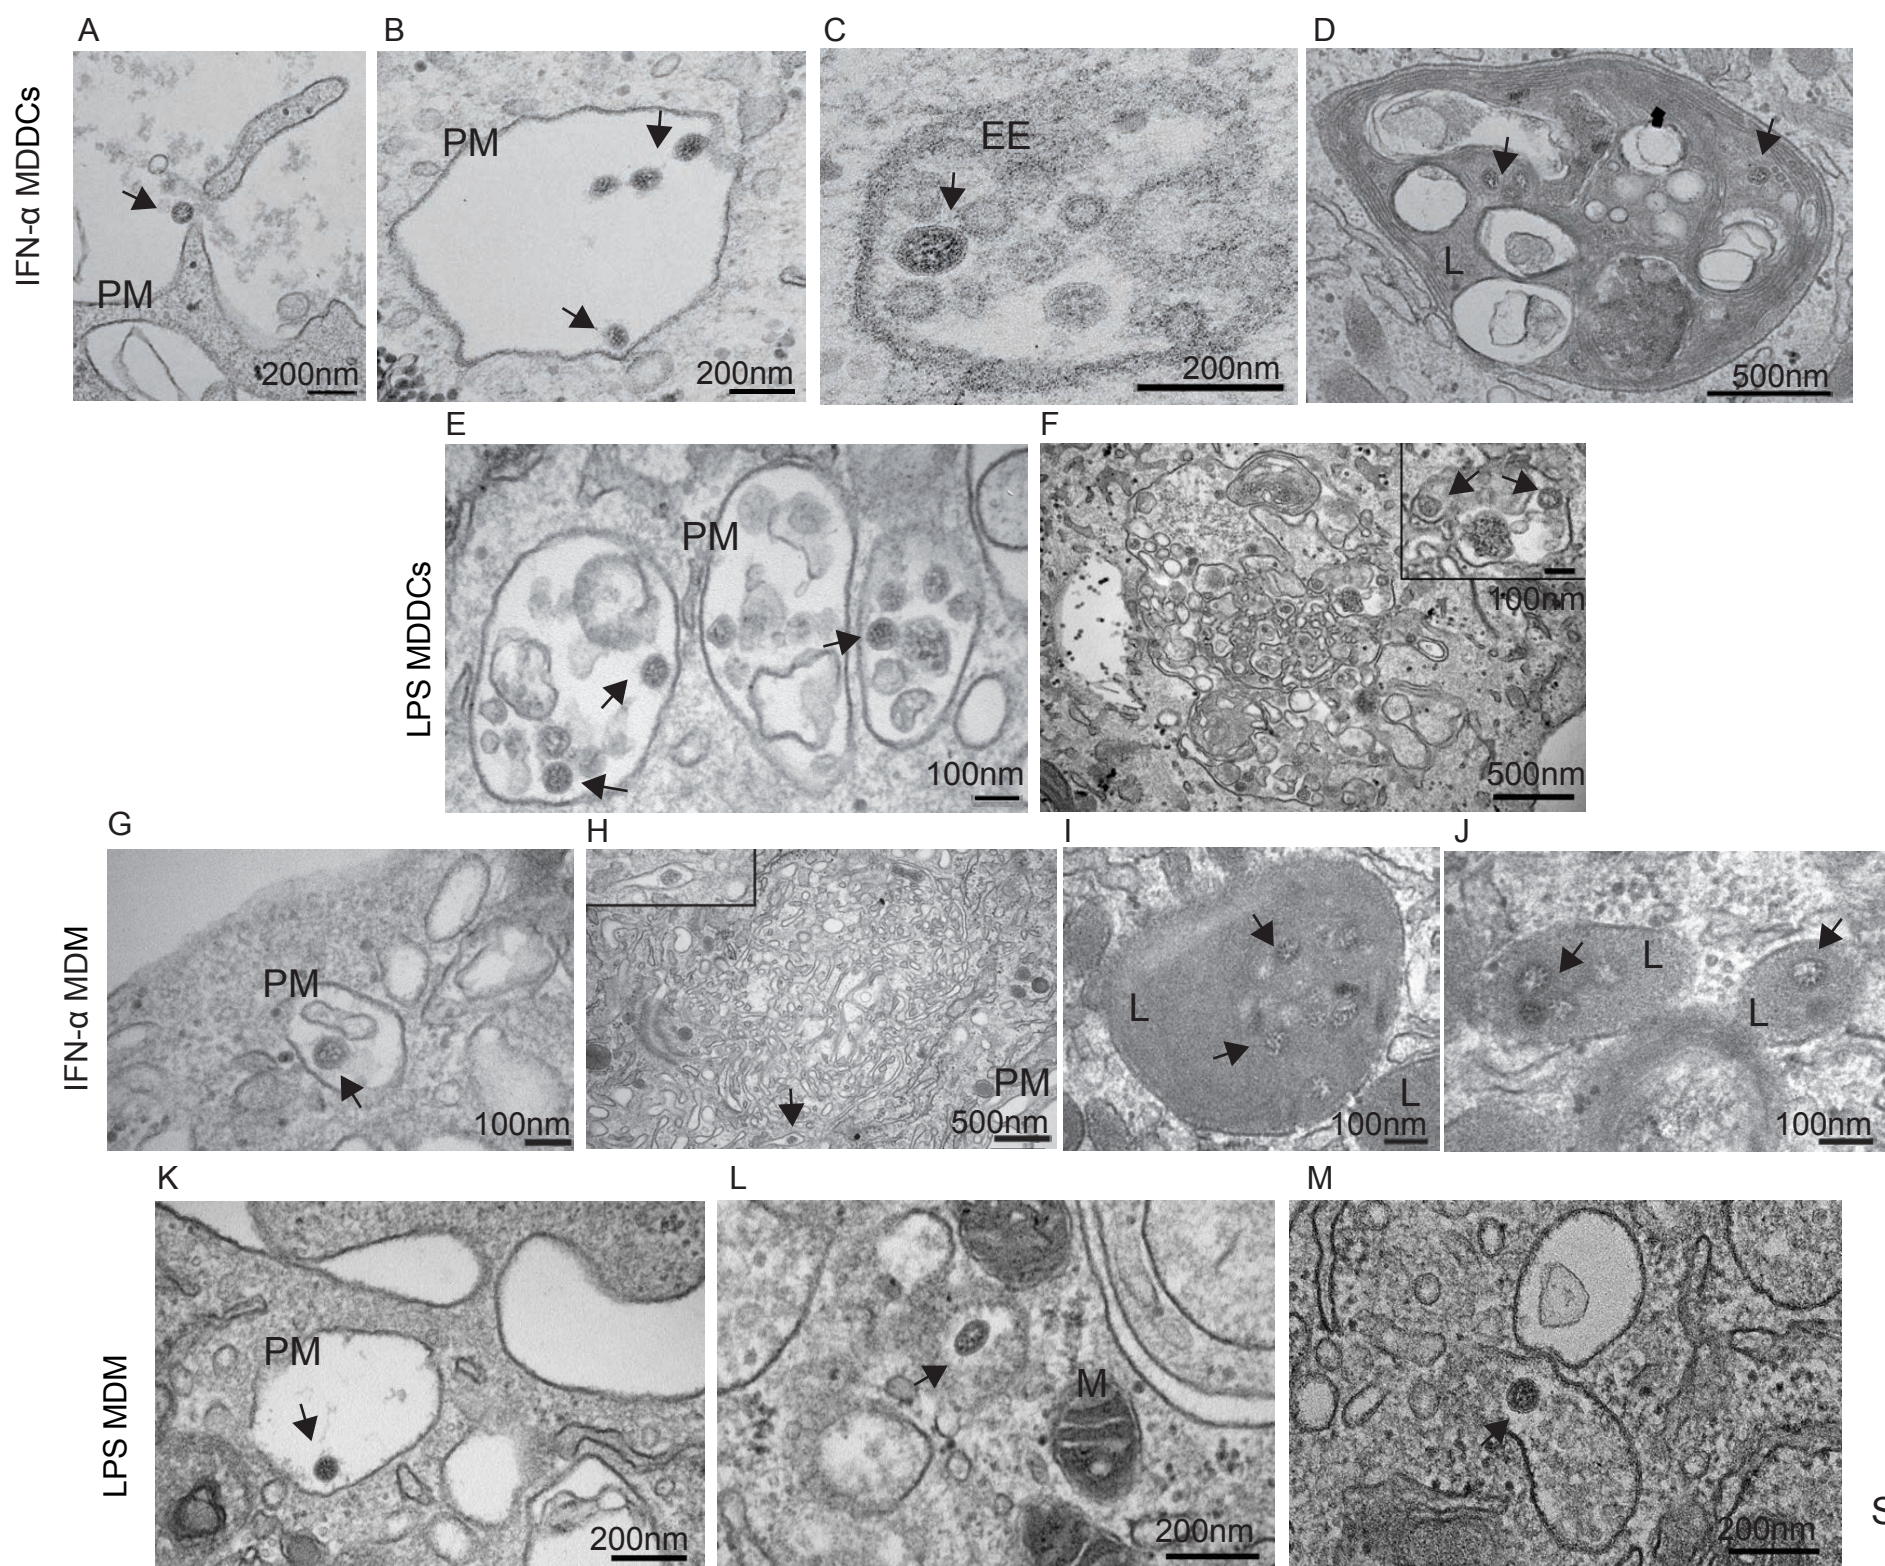

Supplementary  
Figure 2



A

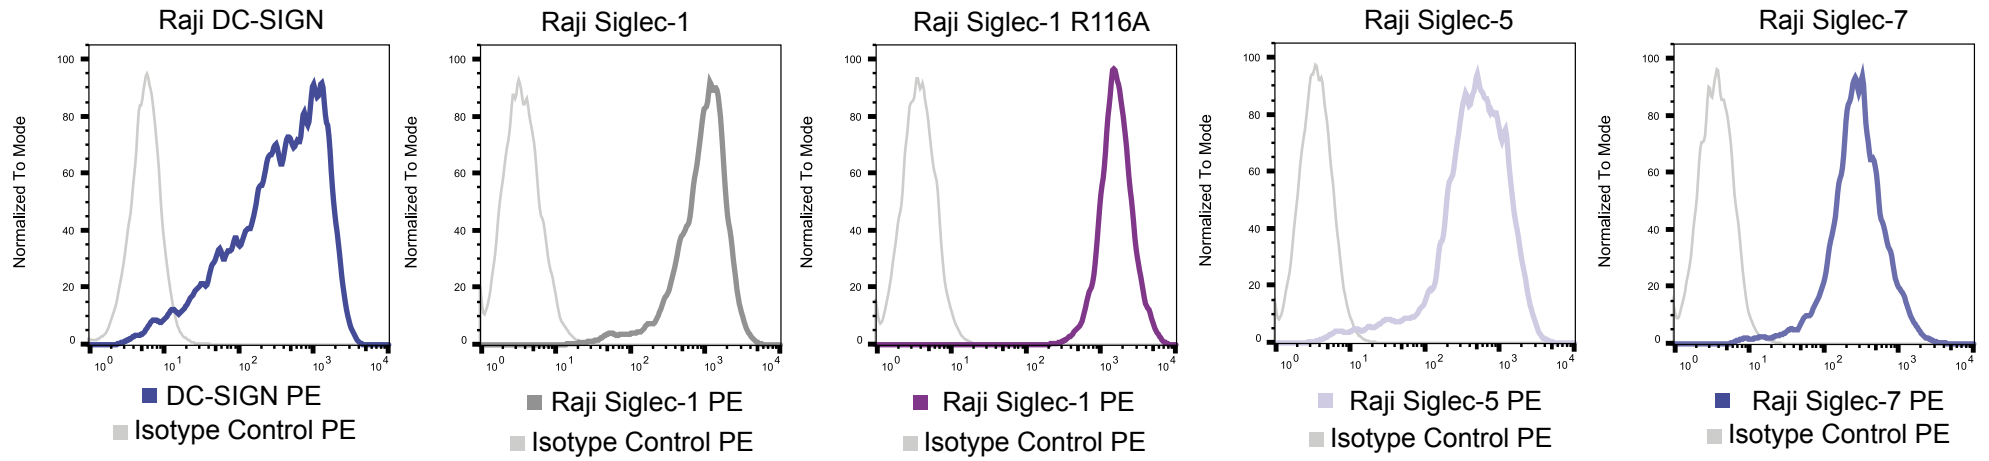

B

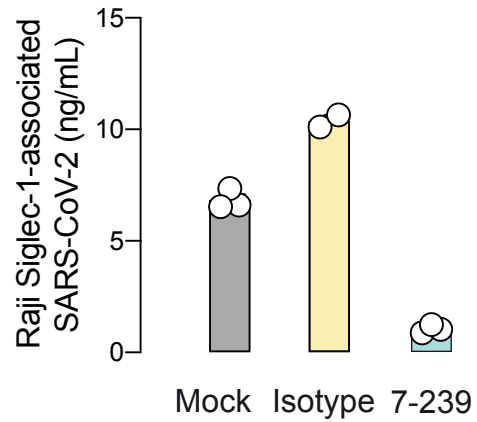

Supplementary Figure 3

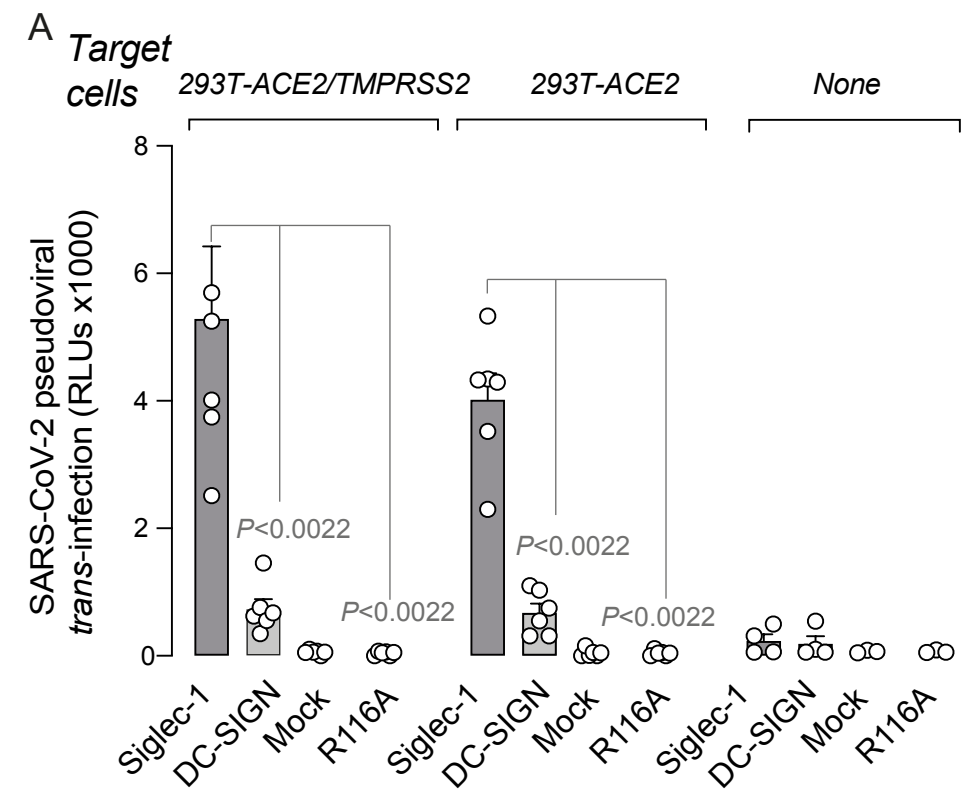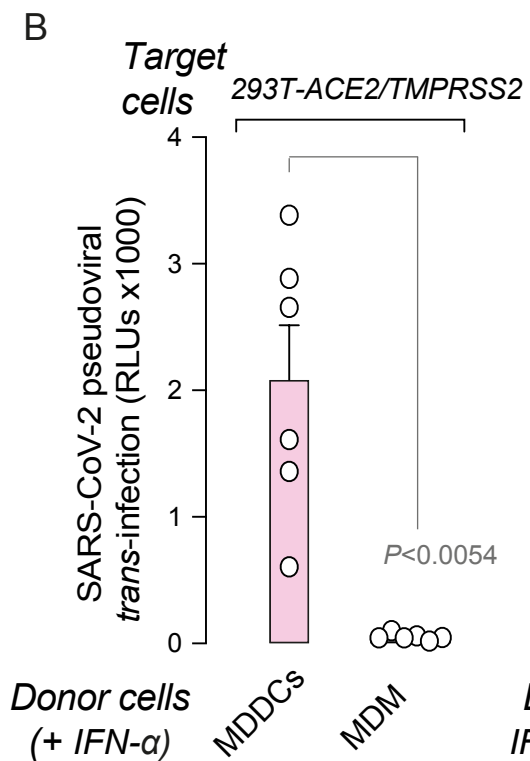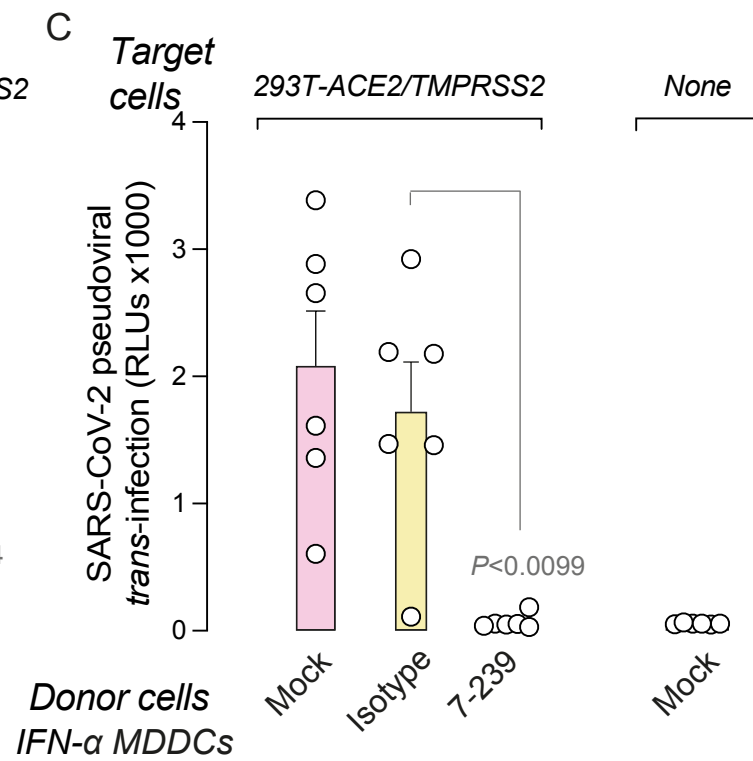

Supplementary Figure 4



A

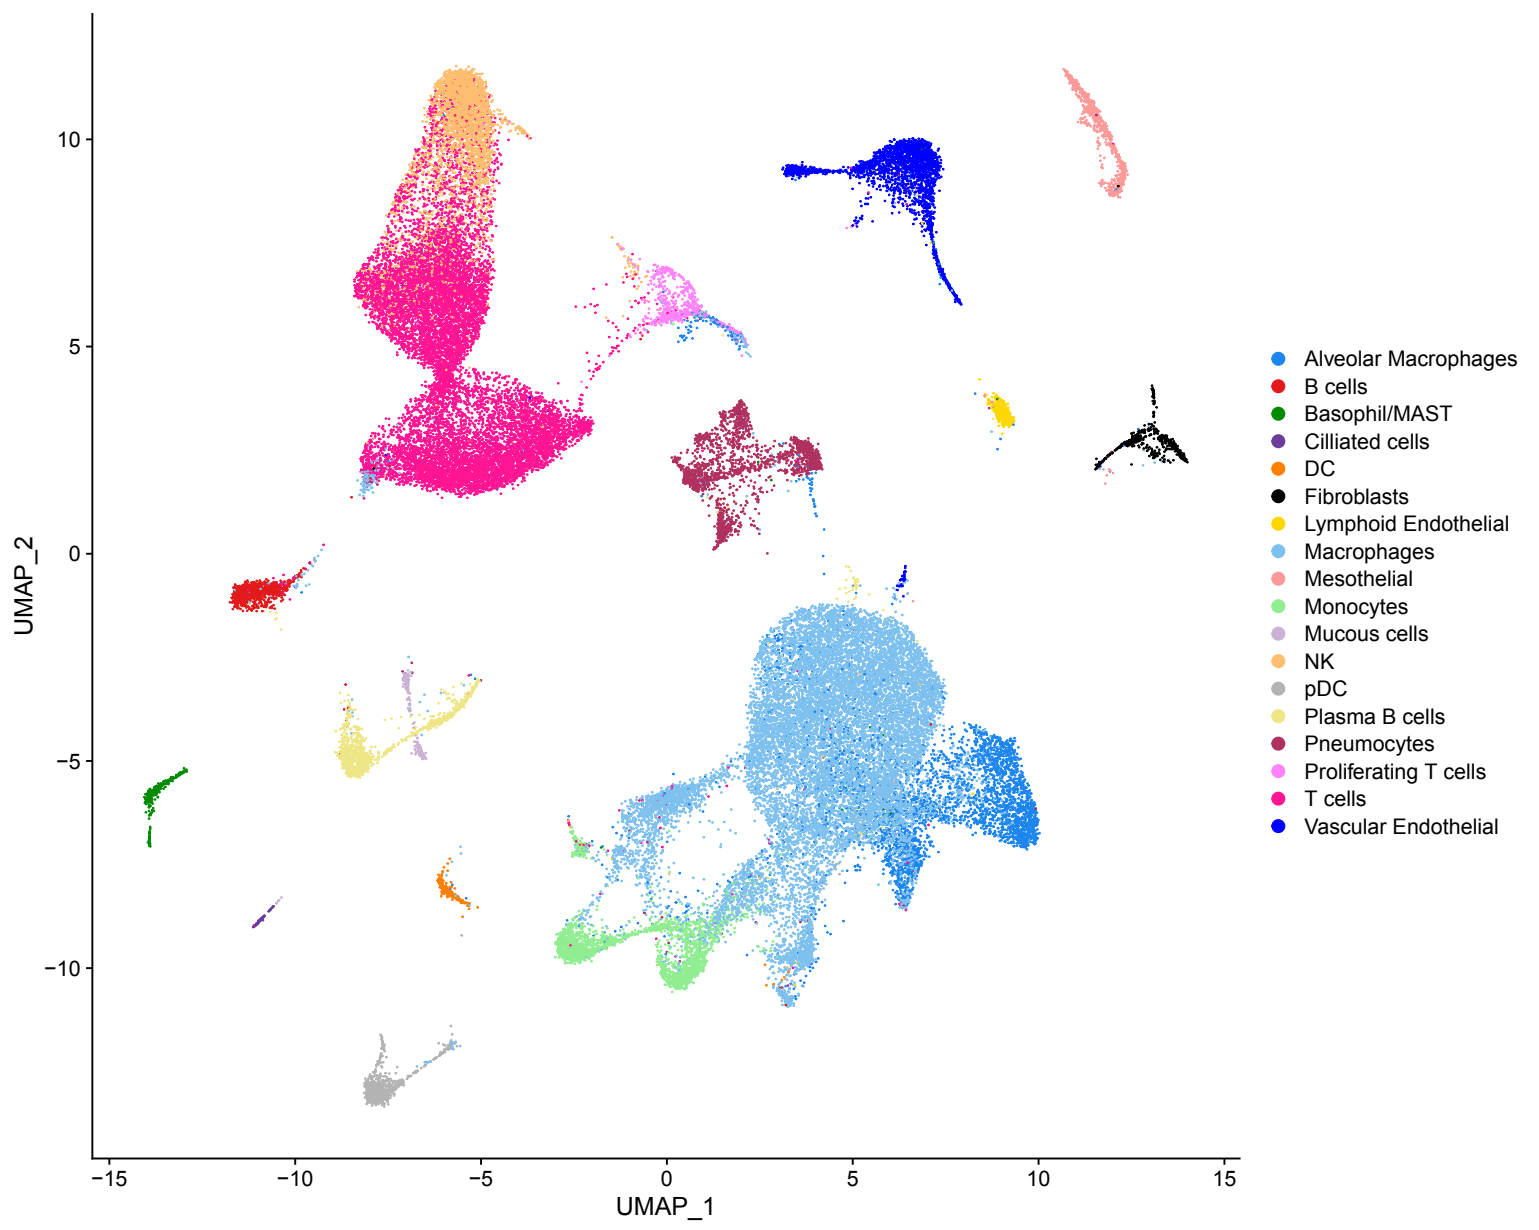

B

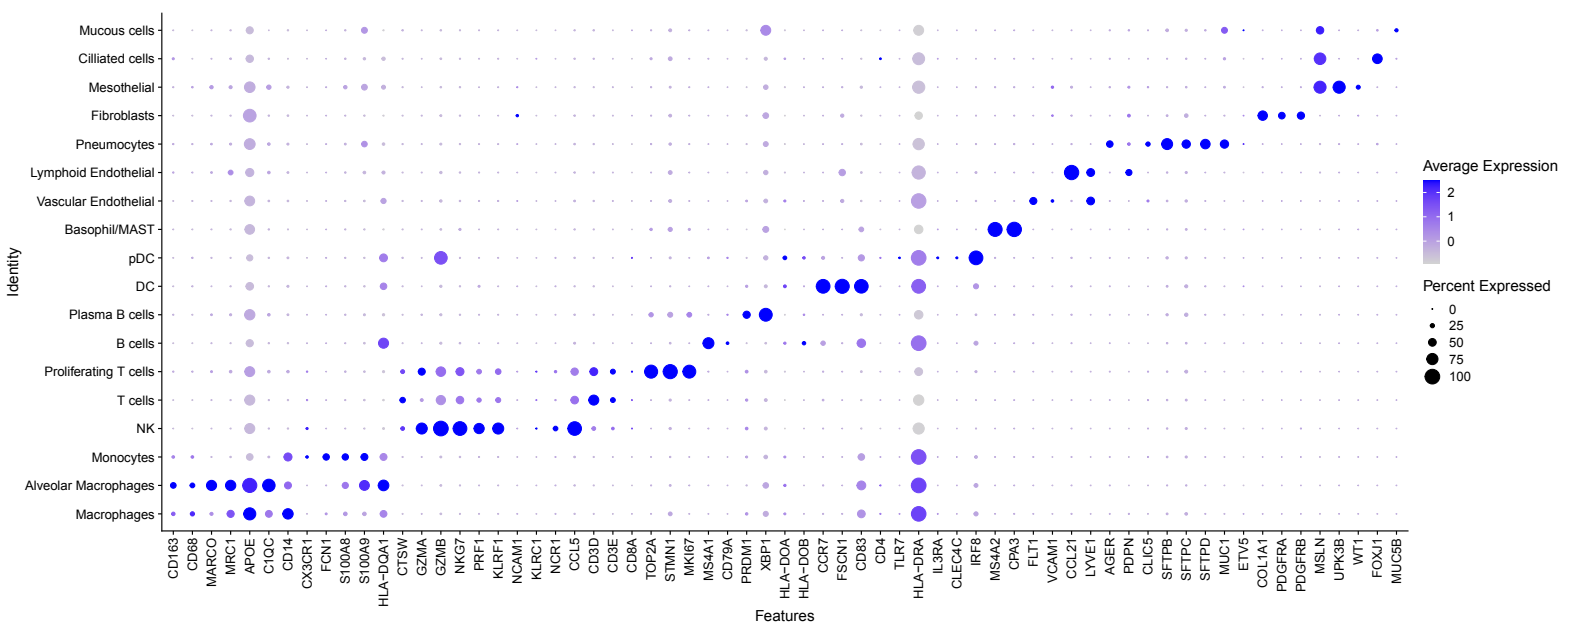

Supplementary Figure 5

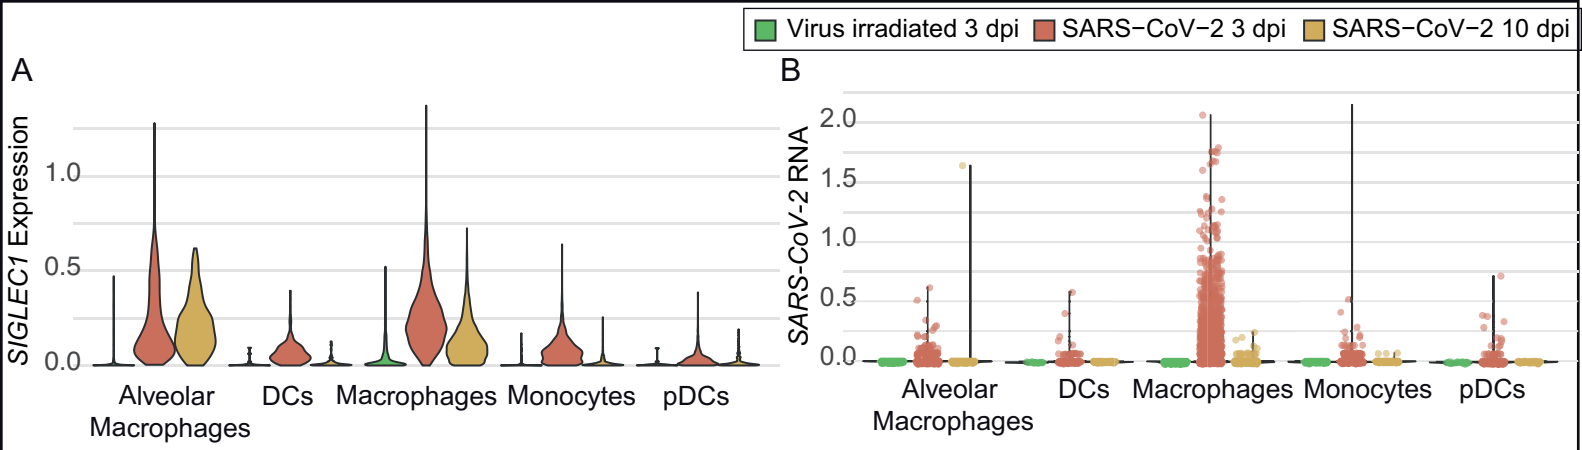

Supplementary Figure 6

A

APC-like    Endothelial cells    Fibroblasts    Myeloid    T cells  
 B cells    Epithelial cells    Mast cells    Neuronal cells

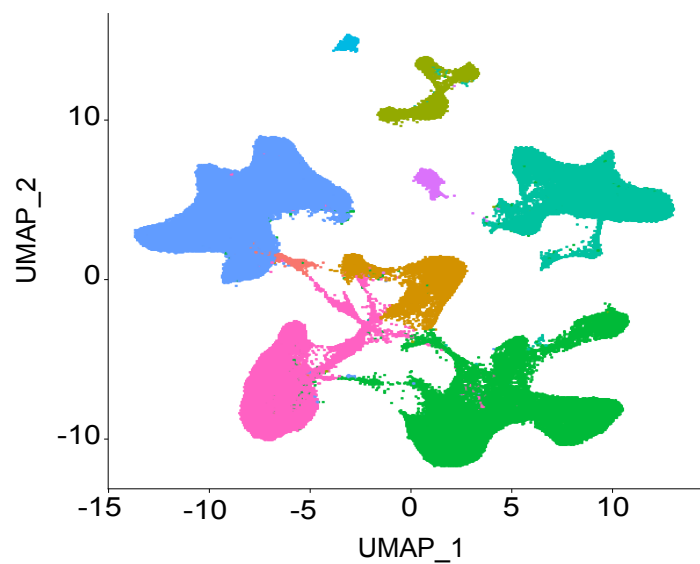

B

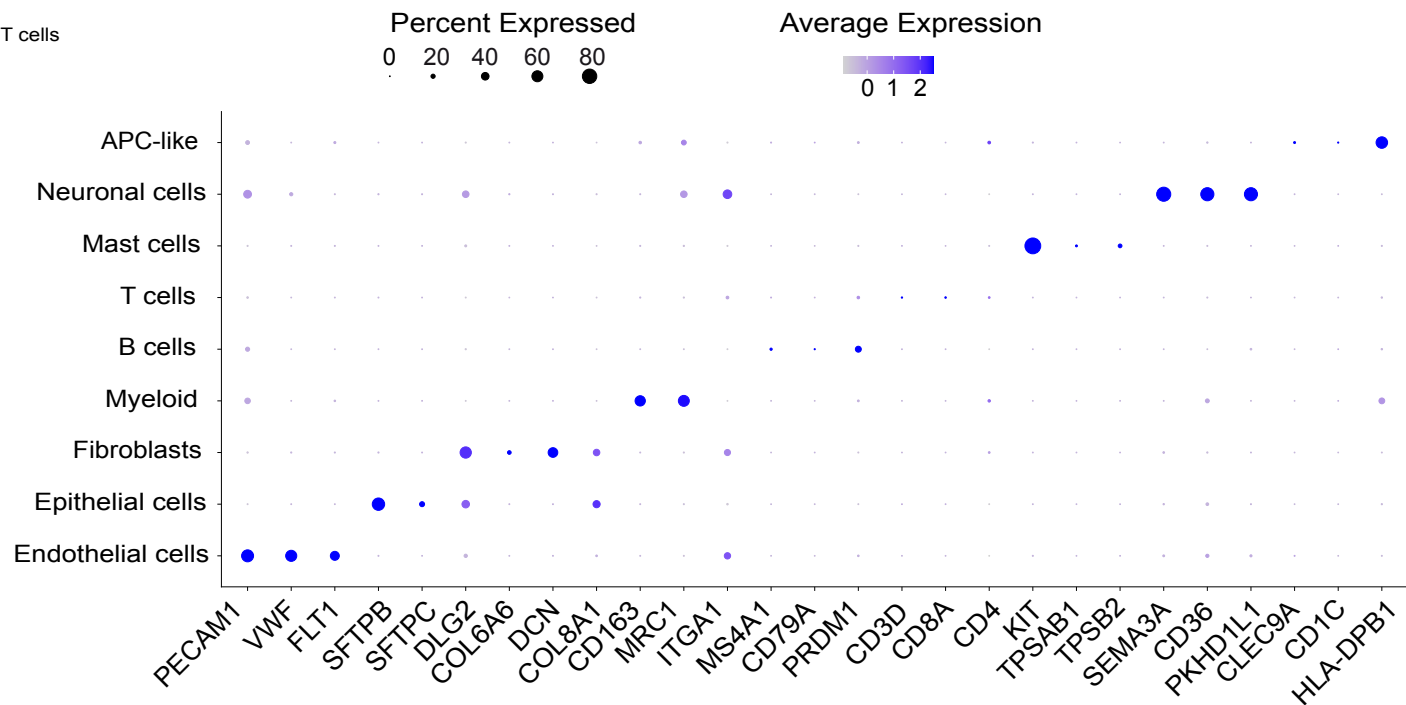

C

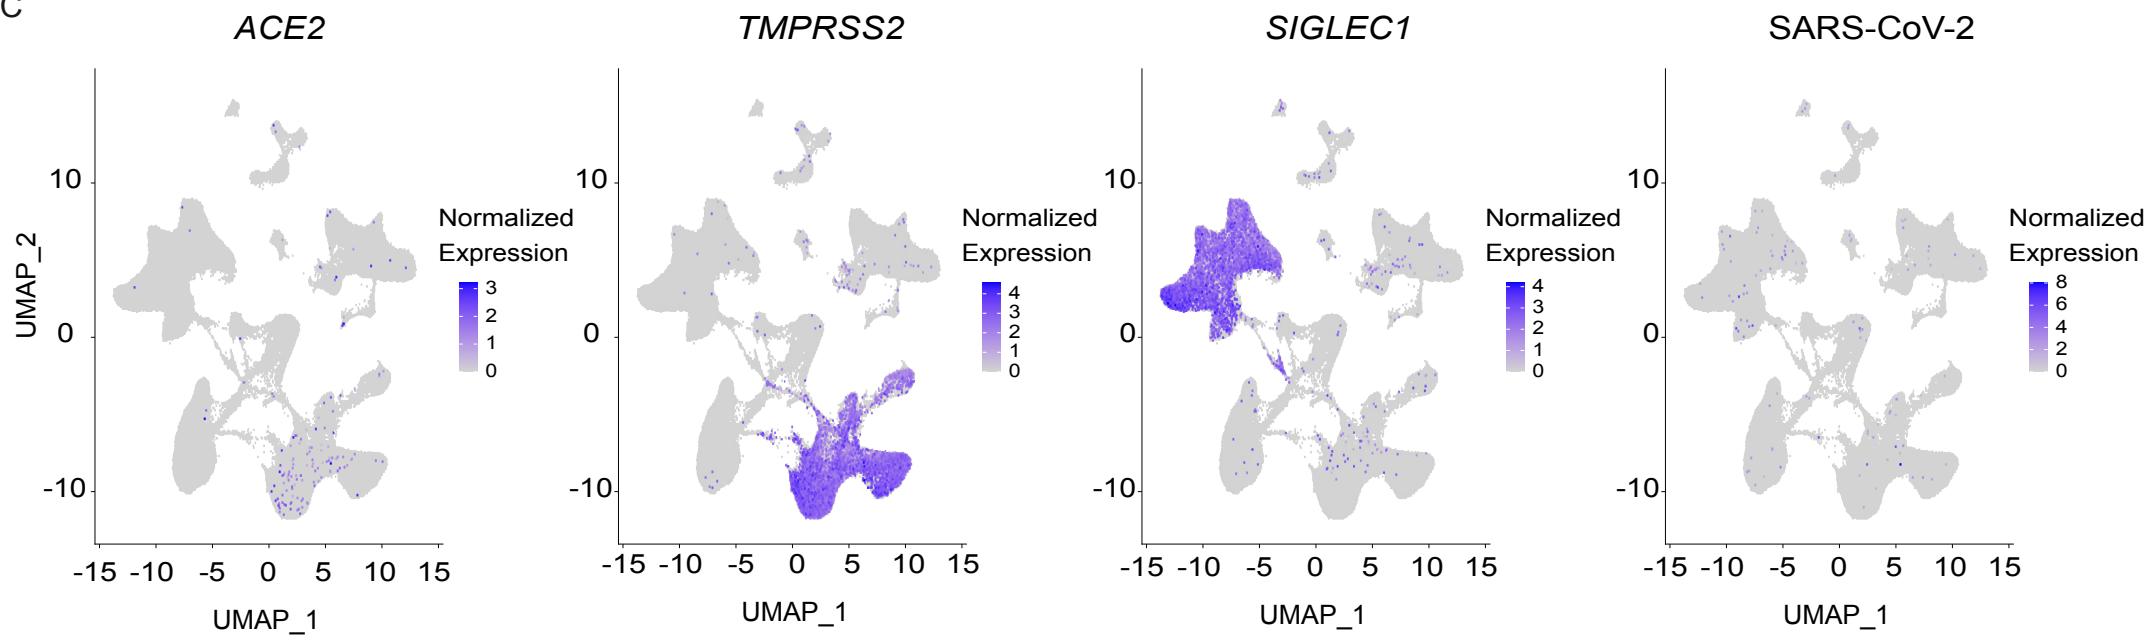



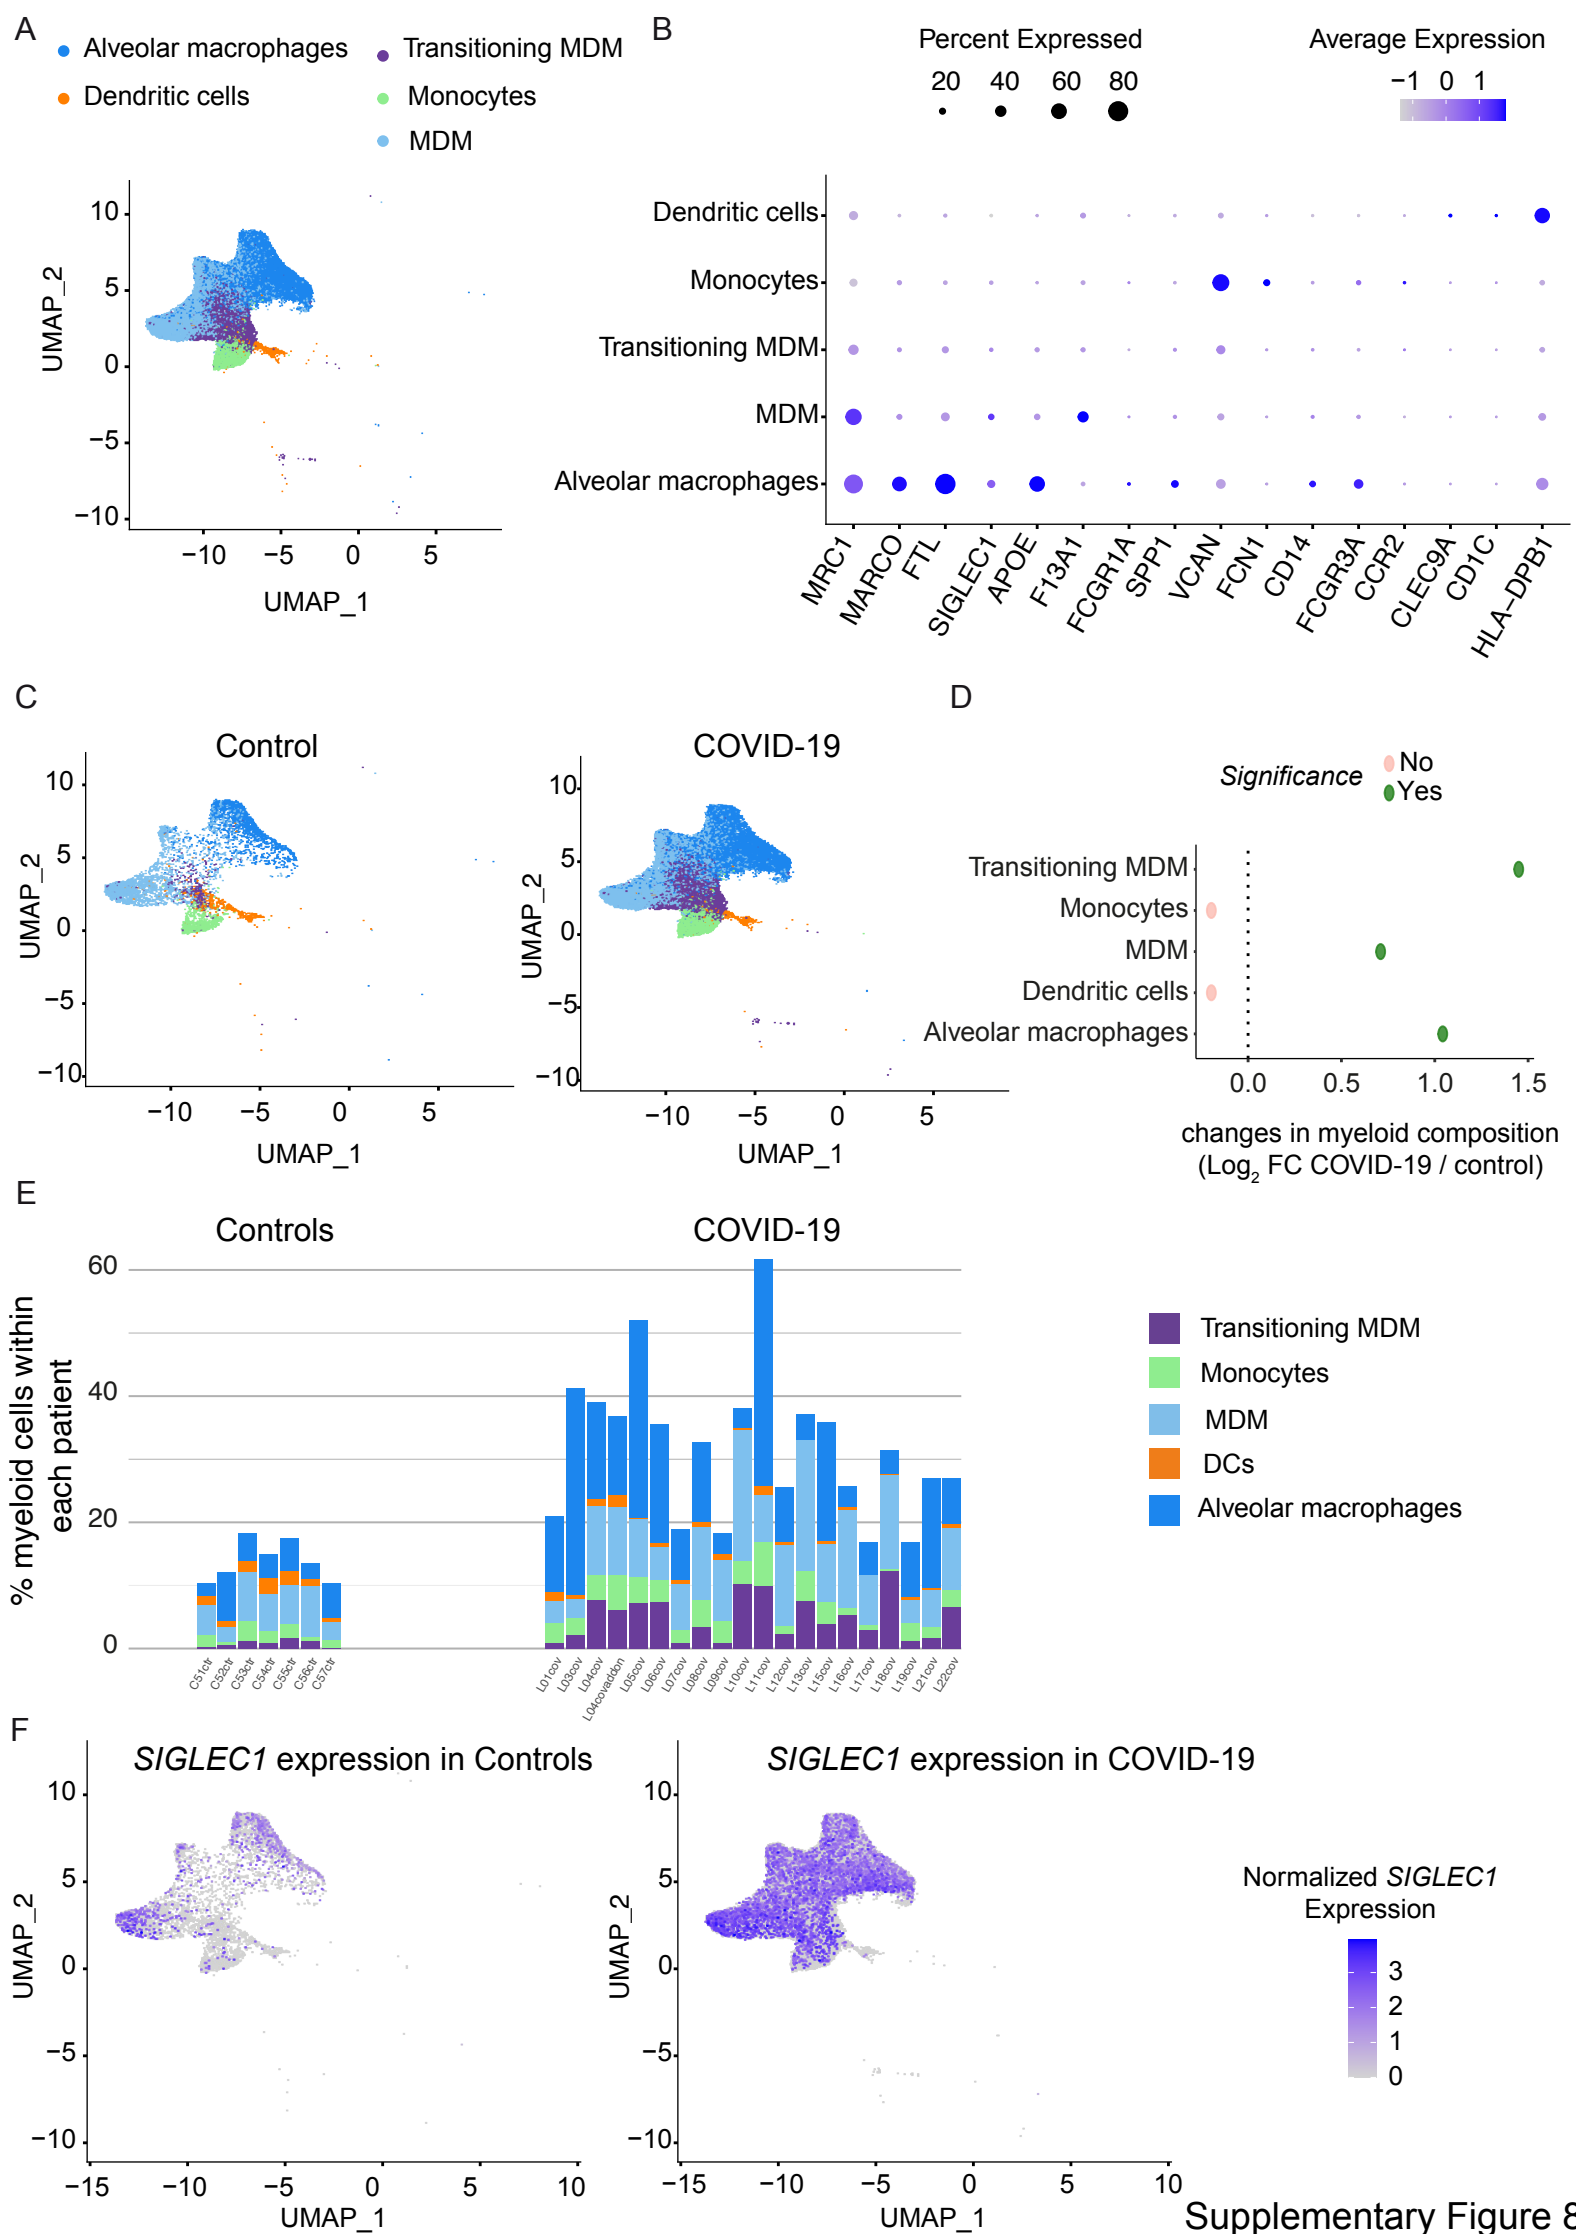

Supplement: 41423_2021_794_MOESM4_ESM.pdf [file 41423_2021_794_MOESM4_ESM.pdf]
